# Supplementary material
Source: Springer Nature journal article supplement (https://www.springermedizin.de/resource/supplementary/12913_2009_1166_MOESM2_ESM.pdf/9528124)

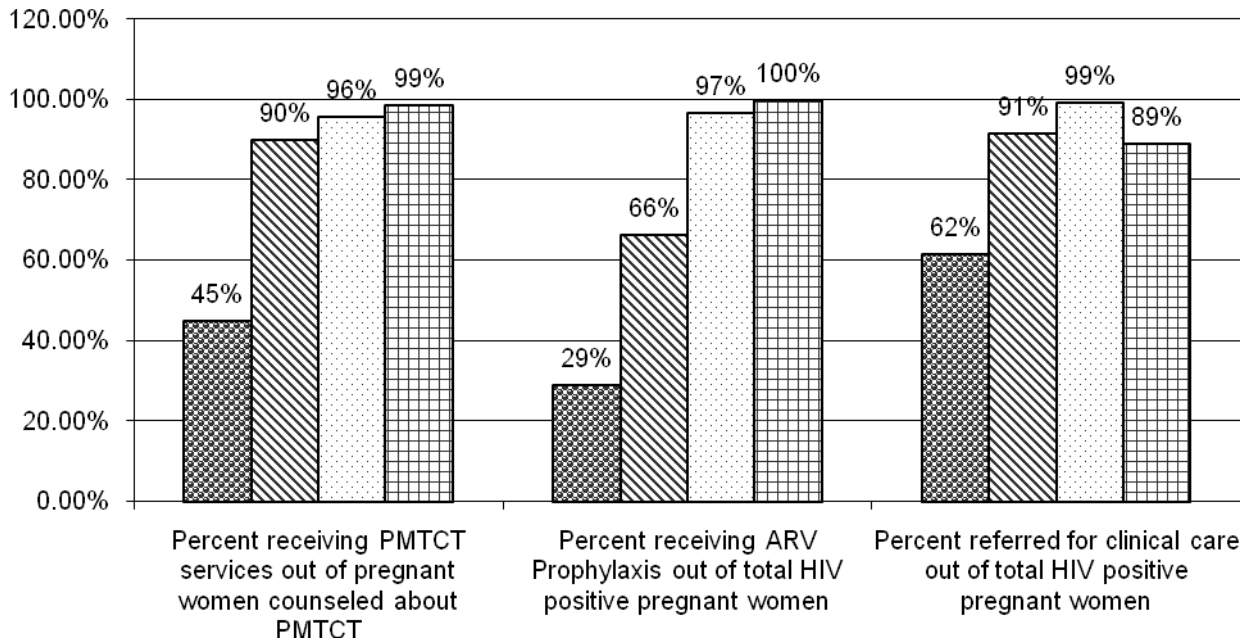

Percent Uptake 2005
  Percent Uptake 2006
  Percent Uptake 2007
  Percent Uptake 2008

Supplement: MOESM2 [file 9528124]
